# Supplementary material for: Serum type and concentration both affect the protein-corona composition of PLGA nanoparticles
Source: publisher site journal article supplement (doi:10.3762/bjnano.10.101), 2019-05-06
Supplement: Additional file 1 [file 2190-4286-10-101-S1.pdf]

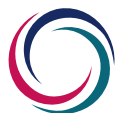

## Supporting Information

for

### **Serum type and concentration both affect the protein-corona composition of PLGA nanoparticles**

Katrin Partikel, Robin Korte, Dennis Mulac, Hans-Ulrich Humpf and Klaus Langer

*Beilstein J. Nanotechnol.* **2019**, *10*, 1002–1015. doi:10.3762/bjnano.10.101

### **Proteins identified on NP surfaces**

**Table S1:** Identified proteins on the surface of PLGA NPs after incubation with FBS. Proteins were identified (✓) in three independent measurements by LC–MS/MS and subsequent data evaluation. Proteins were listed in alphabetical order. Molecular weight ( $M_w$ ) and functions are taken from the web page <https://www.uniprot.org/> and the isoelectric point (pI) was calculated by [https://web.expasy.org/compute\\_pi/](https://web.expasy.org/compute_pi/). Functions were categorized as blood coagulation (BC); regulation of insulin-like growth factor (IGF); immune response (IR); lipoproteins (LP); other serum components (OC); oxygen transport (OT).

| <b>Acession number</b> | <b>Protein</b>                   | <b>Function</b> | <b><math>M_w</math> [Da]</b> | <b>pI</b> | <b>RUN 1</b> | <b>RUN 2</b> | <b>RUN 3</b> |
|------------------------|----------------------------------|-----------------|------------------------------|-----------|--------------|--------------|--------------|
| B0JYQ0                 | ALB protein                      | OC              | 69,294                       | 5.95      | ✓            | ✓            | ✓            |
| P34955                 | Alpha-1-antiproteinase           | OC              | 46,104                       | 6.05      |              | ✓            |              |
| V6F9A2                 | Apolipoprotein A-I preproprotein | LP              | 30,276                       | 5.71      | ✓            | ✓            | ✓            |
| P81644                 | Apolipoprotein A-II              | LP              | 11,202                       | 7.8       | ✓            | ✓            | ✓            |
| P19034                 | Apolipoprotein C-II              | LP              | 11,061                       | 5.67      |              | ✓            | ✓            |
| Q0ZCB4                 | Apolipoprotein E                 | LP              | 27,074                       | 8.87      | ✓            | ✓            | ✓            |
| P17690                 | Beta-2-glycoprotein 1            | LP              | 38,252                       | 8.53      | ✓            | ✓            | ✓            |
| Q32L58                 | C-C motif chemokine              | IR              | 10,337                       | 8.43      | ✓            | ✓            | ✓            |
| Q29RR9                 | C-C motif chemokine ligand 14    | IR              | 10,457                       | 8.98      |              | ✓            |              |
| F1N0I3                 | Coagulation factor V             | BC              | 222,214                      | 5.52      |              | ✓            | ✓            |
| Q2TBQ1                 | Coagulation factor XIII B chain  | BC              | 75,167                       | 6.34      |              | ✓            | ✓            |
| P01030                 | Complement C4                    | IR              | 101,908                      | 6.15      | ✓            | ✓            | ✓            |
| A0A0F6QNP7             | Complement component 3           | IR              | 187,181                      | 6.46      | ✓            | ✓            | ✓            |
| Q3T0A3                 | Complement factor D              | IR              | 27,878                       | 7.64      | ✓            | ✓            | ✓            |
| Q28085                 | Complement factor H              | IR              | 140,374                      | 6.43      | ✓            | ✓            | ✓            |
| F1MC45                 | Complement factor H precursor    | IR              | 96,593                       | 5.98      |              | ✓            |              |
| Q32PI4                 | Complement factor I              | IR              | 68,933                       | 8.07      | ✓            | ✓            | ✓            |
| Q17QC8                 | Complement factor properdin      | IR              | 50,750                       | 8.32      | ✓            | ✓            | ✓            |

|        |                                              |     |         |      |   |   |   |
|--------|----------------------------------------------|-----|---------|------|---|---|---|
| P01035 | Cystatin-C                                   | OC  | 16,265  | 9.23 | ✓ | ✓ | ✓ |
| A6QPP9 | C-X-C motif chemokine                        | IR  | 12,609  | 9.3  | ✓ | ✓ | ✓ |
| F1MYN5 | Fibulin-1                                    | OC  | 77,486  | 4.94 |   | ✓ | ✓ |
| F1N1I6 | Gelsolin                                     | CC  | 85,687  | 5.86 | ✓ | ✓ | ✓ |
| P02081 | Hemoglobin fetal subunit beta                | OT  | 15,859  | 6.51 | ✓ | ✓ | ✓ |
| P01966 | Hemoglobin subunit alpha                     | OT  | 15,184  | 8.07 | ✓ | ✓ | ✓ |
| P02070 | Hemoglobin subunit beta                      | OT  | 15,954  | 7.02 | ✓ |   |   |
| Q2F6J3 | Insulin-like growth factor 2 preproprotein   | IGF | 10,782  | 7.48 |   | ✓ | ✓ |
| P13384 | Insulin-like growth factor-binding protein 2 | IGF | 34,015  | 7.13 | ✓ | ✓ | ✓ |
| Q05716 | Insulin-like growth factor-binding protein 4 | IGF | 27,890  | 7.10 |   | ✓ | ✓ |
| F1MUK3 | Insulin-like growth factor-binding protein 6 | IGF | 24,953  | 8.73 |   | ✓ | ✓ |
| Q95121 | Pigment epithelium-derived factor            | OC  | 46,229  | 6,57 | ✓ | ✓ | ✓ |
| P00735 | Prothrombin                                  | BC  | 70,506  | 5.97 | ✓ | ✓ | ✓ |
| P82943 | Regakine-1                                   | IR  | 10,281  | 8.8  |   | ✓ | ✓ |
| P04815 | Spleen trypsin inhibitor I                   | OC  | 10,843  | 9,00 |   | ✓ | ✓ |
| Q2KIS7 | Tetranectin                                  | OC  | 22,144  | 5.47 |   | ✓ | ✓ |
| Q28194 | Thrombospondin-1                             | OC  | 25,015  | 7.94 |   | ✓ | ✓ |
| E1BH06 | Uncharacterized protein                      | IR  | 192,764 | 7.2  | ✓ | ✓ | ✓ |
| F1MLW7 | Uncharacterized protein                      | OC  | 24,397  | 7.53 |   | ✓ |   |
| Q3ZBS7 | Vitronectin                                  | CC  | 53,575  | 5.92 |   |   | ✓ |

---

**Table S2:** Identified proteins on the surface of PLGA NPs after incubation with human serum. Proteins were identified (✓) in three independent measurements by LC–MS/MS and subsequent data evaluation. Proteins were listed in alphabetical order. Molecular weight ( $M_w$ ) and functions are taken from the web page <https://www.uniprot.org/> and the isoelectric point (pI) was calculated by [https://web.expasy.org/compute\\_pi/](https://web.expasy.org/compute_pi/). Functions were categorized as blood coagulation (BC); regulation of insulin-like growth factor (IGF); immune response (IR); lipoproteins (LP); other serum components (OC); oxygen transport (OT).

| Acession number | Protein                                                                          | Function | $M_w$ [Da] | pI    | RUN 1 | RUN 2 | RUN 3 |
|-----------------|----------------------------------------------------------------------------------|----------|------------|-------|-------|-------|-------|
| G3GAU4          | Anti-H1N1 influenza HA kappa chain variable region                               | IR       | 11,606     | 8.07  |       | ✓     | ✓     |
| A2KBC5          | Anti-HCS scFv                                                                    | OC       | 25,223     | 8.29  | ✓     |       |       |
| Q96SB0          | Anti-streptococcal/anti-myosin immunoglobulin lambda light chain variable region | IR       | 11,594     | 6.32  | ✓     | ✓     |       |
| Q8TCE1          | Antithrombin-III                                                                 | BC       | 29,092     | 9.03  | ✓     | ✓     | ✓     |
| P02647          | Apolipoprotein A-I                                                               | LP       | 30,778     | 5.56  | ✓     | ✓     | ✓     |
| P02652          | Apolipoprotein A-II                                                              | LP       | 11,175     | 6.27  | ✓     | ✓     | ✓     |
| P06727          | Apolipoprotein A-IV                                                              | LP       | 45,399     | 5.28  | ✓     | ✓     | ✓     |
| P02654          | Apolipoprotein C-I                                                               | LP       | 9,332      | 8.01  | ✓     | ✓     | ✓     |
| P02655          | Apolipoprotein C-II                                                              | LP       | 11,284     | 4.64  | ✓     | ✓     | ✓     |
| P02656          | Apolipoprotein C-III                                                             | LP       | 10,852     | 5.23  |       |       | ✓     |
| P02649          | Apolipoprotein E                                                                 | LP       | 36,154     | 5.65  | ✓     | ✓     | ✓     |
| Q8TCZ8          | Apolipoprotein E                                                                 | LP       | 6,664      | 10.00 |       | ✓     |       |
| A2NI60          | BRE                                                                              | OC       | 11,938     | 4.36  | ✓     | ✓     |       |
| D9IWP9          | Beta-2-glycoprotein I                                                            | LP       | 36,255     | 8.37  | ✓     | ✓     | ✓     |
| F5H2D0          | Complement C1r subcomponent                                                      | IR       | 76,614     | 5.63  | ✓     | ✓     | ✓     |
| F8WCZ6          | Complement C1s subcomponent                                                      | IR       | 57,519     | 5.31  | ✓     | ✓     | ✓     |
| B4E216          | Complement C3                                                                    | IR       | 122,592    | 6.5   | ✓     | ✓     | ✓     |

|            |                                       |    |         |      |   |   |   |
|------------|---------------------------------------|----|---------|------|---|---|---|
| A0A140TA32 | Complement C4-A                       | IR | 187,763 | 6.7  | ✓ | ✓ | ✓ |
| P08603     | Complement factor H                   | IR | 139,096 | 6.21 | ✓ | ✓ | ✓ |
| Q03591     | Complement factor H-related protein 1 | IR | 37,651  | 7.39 | ✓ | ✓ | ✓ |
| V9GYE7     | Complement factor H-related protein 2 | IR | 28,912  | 6.44 | ✓ |   |   |
| A6XNE2     | Complement factor D preproprotein     | IR | 27,780  | 6.82 |   | ✓ | ✓ |
| V9HW34     | Epididymis luminal protein 213        | OC | 25,646  | 6.15 | ✓ | ✓ | ✓ |
| P06396     | Gelsolin                              | CC | 85,697  | 5.9  | ✓ | ✓ | ✓ |
| Q6MZV7     | Hepatitis B virus binding protein     | OC | 52,121  | 7.51 | ✓ | ✓ | ✓ |
| Q6ZW64     | Ig alpha-1 chain C region             | IR | 53,321  | 6.07 | ✓ | ✓ | ✓ |
| A0A075B6N8 | Ig gamma-3 chain C region             | IR | 41,335  | 8.23 | ✓ | ✓ | ✓ |
| P01861     | Ig gamma-4 Chain C region             | IR | 35,941  | 7.18 | ✓ | ✓ | ✓ |
| Q6PJF2     | IGK@ protein                          | IR | 25,521  | 6.14 | ✓ | ✓ | ✓ |
| Q6P5S8     | IGK@ protein                          | IR | 25,773  | 5.94 |   | ✓ | ✓ |
| S6AWD3     | IgG L chain                           | IR | 19,942  | 9.1  |   | ✓ |   |
| S6AWF4     | IgG L chain                           | IR | 19,842  | 6.57 | ✓ | ✓ | ✓ |
| S6BGD6     | IgG L chain                           | IR | 24,824  | 6.81 | ✓ | ✓ | ✓ |
| S6BAN6     | IgG L chain                           | IR | 22,920  | 8.56 | ✓ | ✓ | ✓ |
| S6B294     | IgG L chain                           | IR | 20,110  | 8.96 |   | ✓ |   |
| S6C4R6     | IgG L chain                           | IR | 20,315  | 6.22 | ✓ | ✓ | ✓ |
| Q8N355     | IGL@ protein                          | IR | 24,793  | 5.93 | ✓ | ✓ | ✓ |
| Q6GMW3     | IGL@ protein                          | IR | 24,654  | 5.94 | ✓ | ✓ | ✓ |
| Q6GMW4     | IGL@ protein                          | IR | 24,855  | 6.29 |   | ✓ | ✓ |
| Q6NS95     | IGL@ protein                          | IR | 25,148  | 6.19 | ✓ |   | ✓ |
| P01871     | Ig mu chain C region                  | IR | 49,307  | 6.35 |   | ✓ | ✓ |
| P01591     | Immunoglobulin J chain                | IR | 18,099  | 5.09 | ✓ |   |   |

|            |                                                 |    |         |      |   |   |   |
|------------|-------------------------------------------------|----|---------|------|---|---|---|
| P06309     | Immunoglobulin kappa variable 2D-28             | IR | 12,957  | 5.61 | ✓ |   |   |
| A0A0B4J1T9 | Immunoglobulin kappa variable 3-15              | IR | 12,496  | 5.14 |   | ✓ | ✓ |
| P01621     | Immunoglobulin kappa variable 3-20              | IR | 10,729  | 4.85 | ✓ | ✓ | ✓ |
| P18136     | Immunoglobulin kappa variable 3-20              | IR | 14,089  | 4.85 | ✓ | ✓ | ✓ |
| P06314     | Immunoglobulin kappa variable 4-1               | IR | 14,966  | 5.09 |   | ✓ |   |
| B9A064     | Immunoglobulin lambda-like polypeptide 5        | IR | 23,063  | 9.08 |   |   | ✓ |
| Q0KKI6     | Immunoglobulin light chain                      | IR | 24,030  | 8.29 | ✓ | ✓ |   |
| Q14624     | Inter-alpha-trypsin inhibitor heavy chain H4    | IR | 103,357 | 6.51 | ✓ | ✓ | ✓ |
| A2NUT2     | Lambda-chain (AA-20 to 215)                     | IR | 24,655  | 7.54 |   | ✓ | ✓ |
| V9HWP0     | Pentaxin                                        | OC | 25,387  | 6.1  | ✓ |   |   |
| P02775     | Platelet basic protein                          | OC | 13,894  | 9.04 | ✓ | ✓ | ✓ |
| P02776     | Platelet factor 4                               | BC | 10,845  | 8.93 | ✓ | ✓ | ✓ |
| P10720     | Platelet factor 4 variant                       | BC | 11,553  | 9.3  |   | ✓ | ✓ |
| P27918     | Properdin                                       | IR | 51,276  | 8.32 | ✓ | ✓ | ✓ |
| A0A096LPE2 | Protein SAA2-SAA4                               | IR | 23,353  | 9.1  | ✓ | ✓ | ✓ |
| P00734     | Prothrombin                                     | BC | 70,037  | 5.63 | ✓ | ✓ | ✓ |
| Q6MZU6     | Putative uncharacterized protein DKFZp686C15213 | OC | 51,099  | 7.85 | ✓ |   |   |
| Q6N093     | Putative uncharacterized protein DKFZp686I04196 | OC | 46,061  | 7.63 | ✓ | ✓ | ✓ |
| Q6MZX7     | Putative uncharacterized protein DKFZp686M24218 | OC | 52,421  | 7.89 | ✓ | ✓ | ✓ |
| P02768     | Serum albumin                                   | OC | 69,367  | 5.92 | ✓ | ✓ | ✓ |
| B2R5G8     | Serum amyloid A protein                         | IR | 14,808  | 9.04 | ✓ | ✓ | ✓ |
| E9PQD6     | Serum amyloid A protein                         | IR | 13,546  | 6.28 |   | ✓ | ✓ |
| E9PHK0     | Tetranectin                                     | OC | 17,794  | 4.96 | ✓ | ✓ | ✓ |

|        |                         |    |        |      |   |   |   |
|--------|-------------------------|----|--------|------|---|---|---|
| Q6GMX0 | Uncharacterized protein | OC | 25,807 | 8.17 | ✓ | ✓ | ✓ |
| Q6N095 | Uncharacterized protein | OC | 52,360 | 8.84 | ✓ |   | ✓ |
| Q8TCD0 | Uncharacterized protein | OC | 26,235 | 8.24 |   | ✓ | ✓ |
| D9ZGG2 | Vitronectin             | CC | 54,306 | 5.55 | ✓ | ✓ | ✓ |

---
